# Supplementary material for: Continental-scale bias-corrected climate and hydrological projections for Australia
Source: Copernicus journal article supplement (doi:10.5194/gmd-17-2755-2024), 2024-04-12
Supplement: Supplementary file 1 [file gmd-17-2755-2024-supplement.pdf]

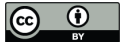

*Supplement of*

## **Continental-scale bias-corrected climate and hydrological projections for Australia**

**Justin Peter et al.**

*Correspondence to:* Ulrike Bende-Michl ([ulrike.bende-michl@bom.gov.au](mailto:ulrike.bende-michl@bom.gov.au))

The copyright of individual parts of the supplement might differ from the article licence.

# Supplementary figures

AUS

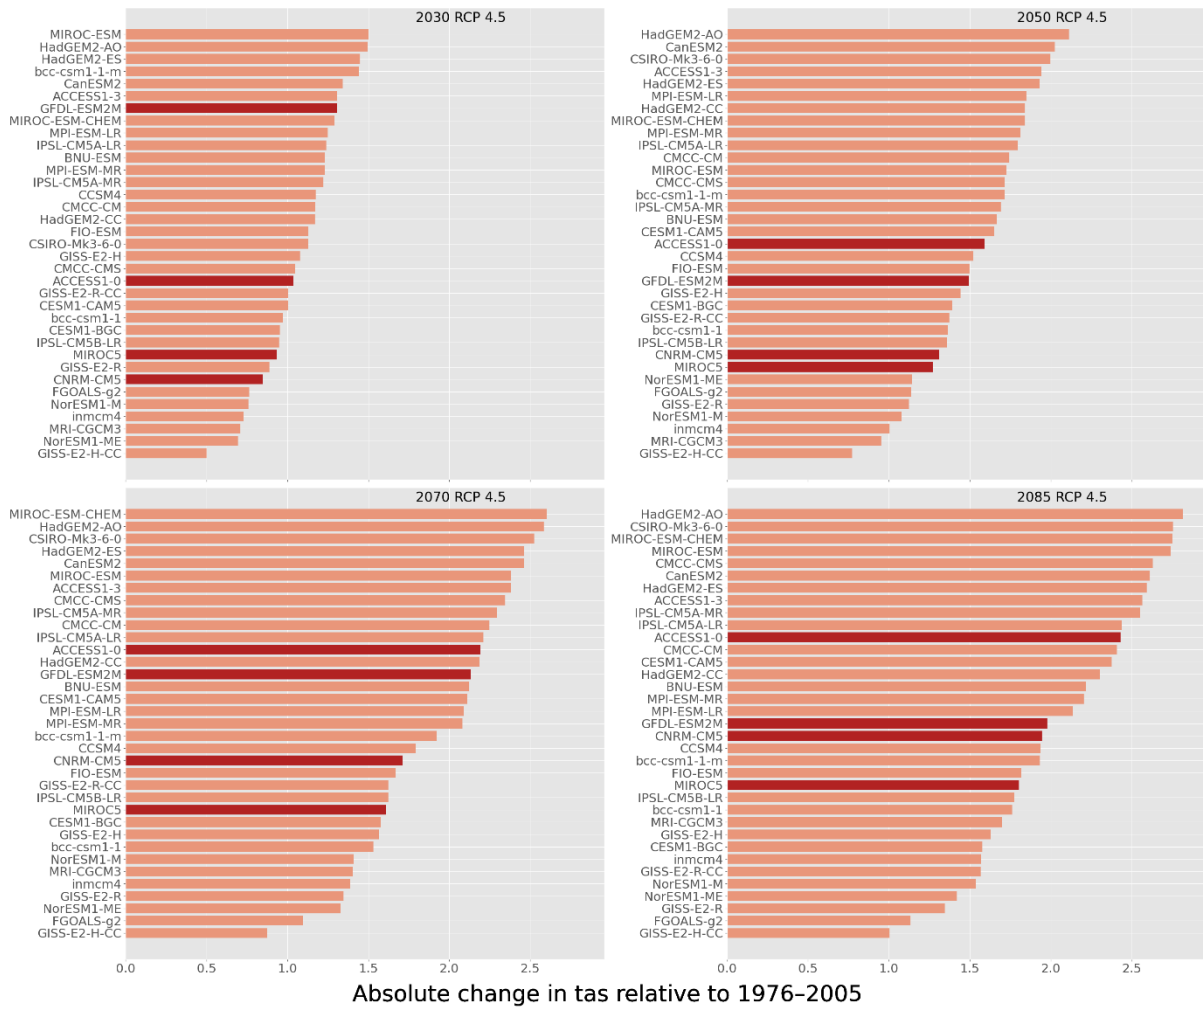

Figure S1: The same as Figure 2 for RCP4.5.

AUS

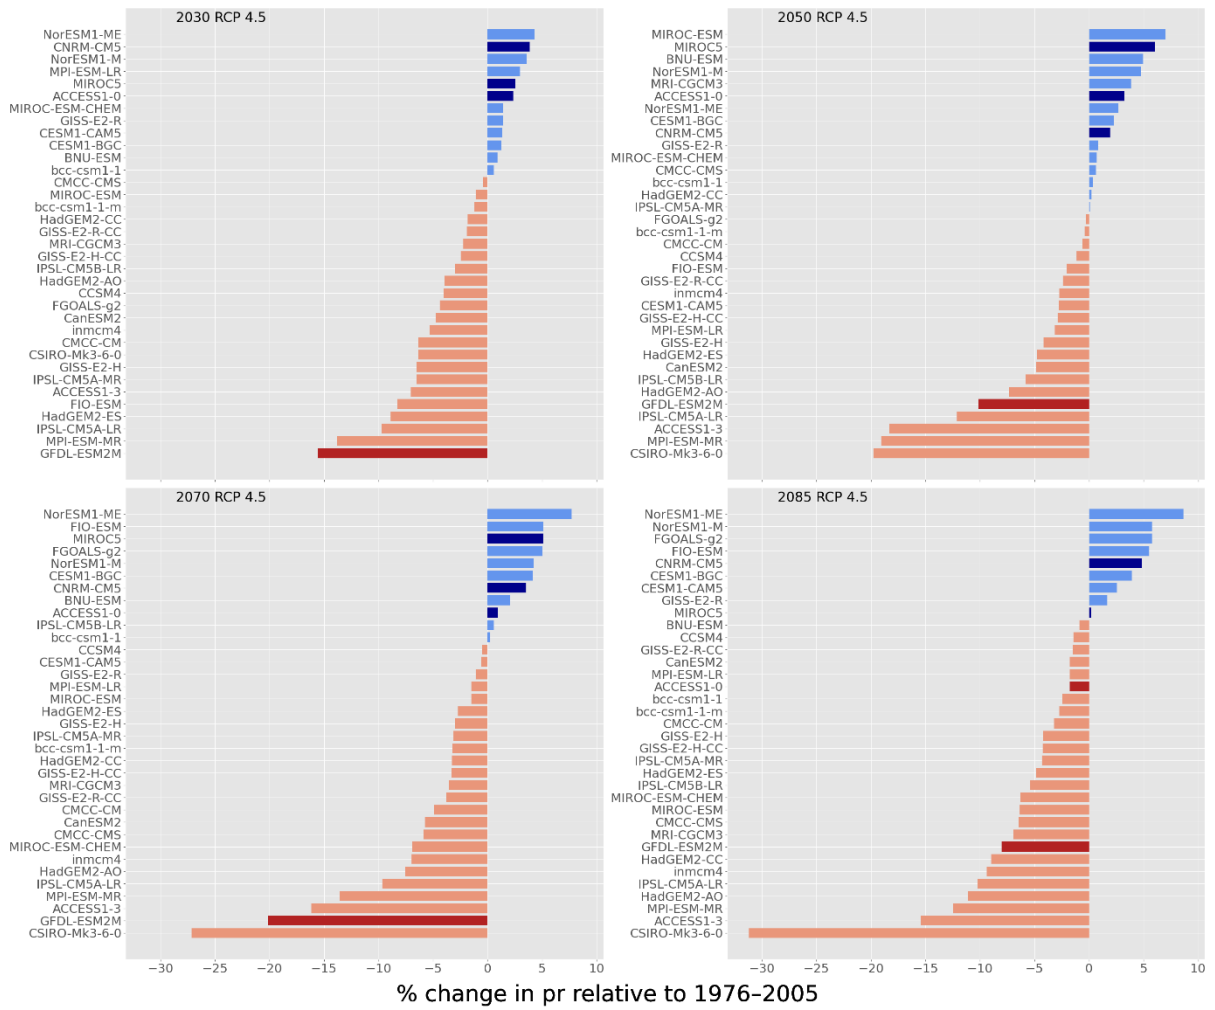

Figure S2: The same as Figure 3 for RCP4.5.

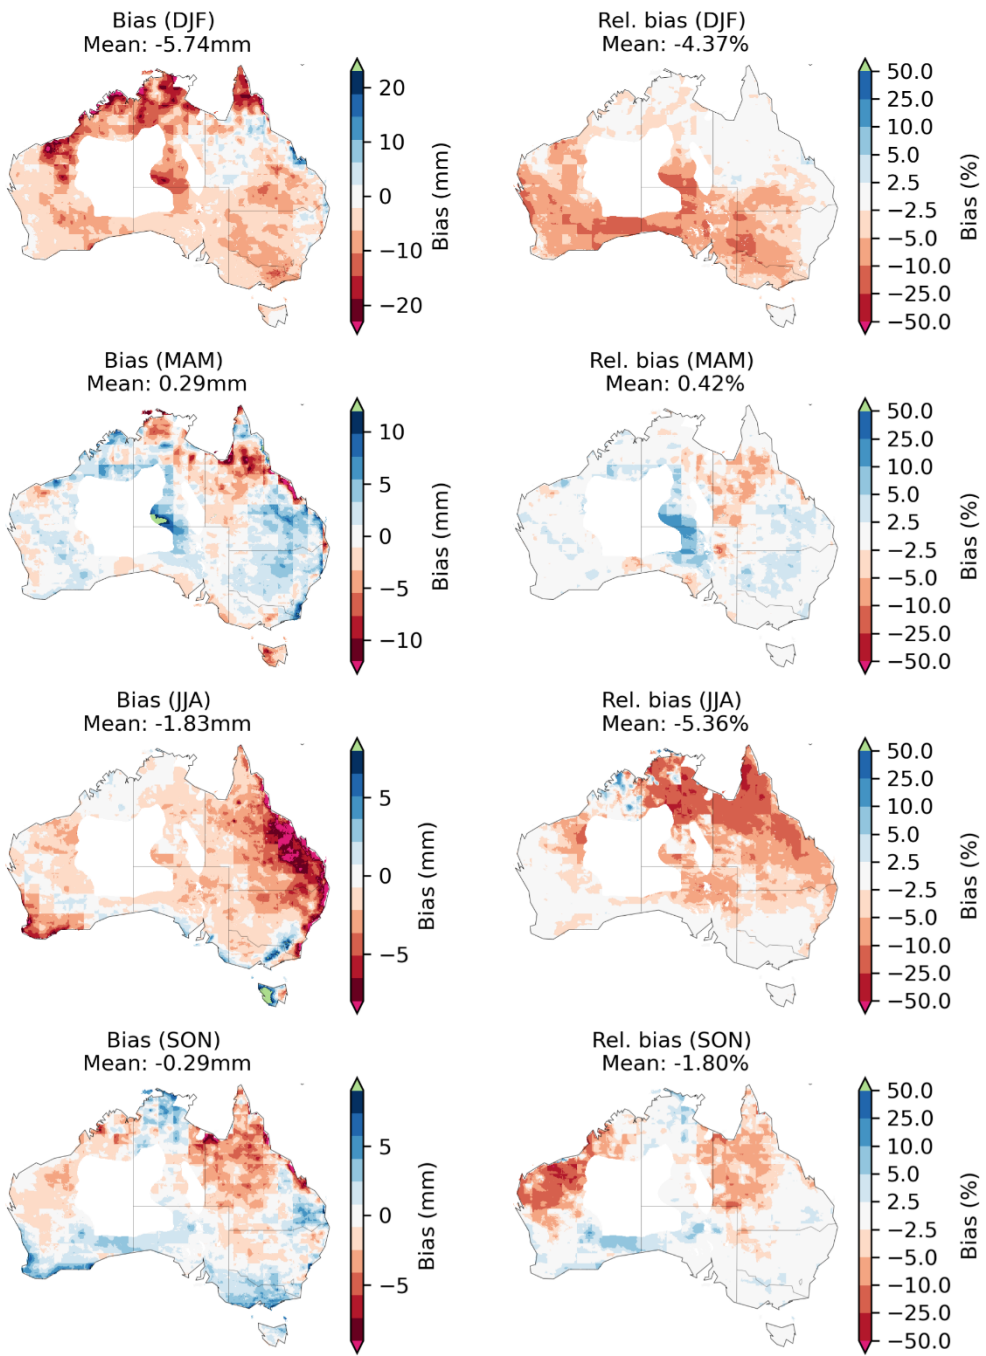

**Figure S3: The same as Figure 8(a) but for seasonal biases of precipitation.**

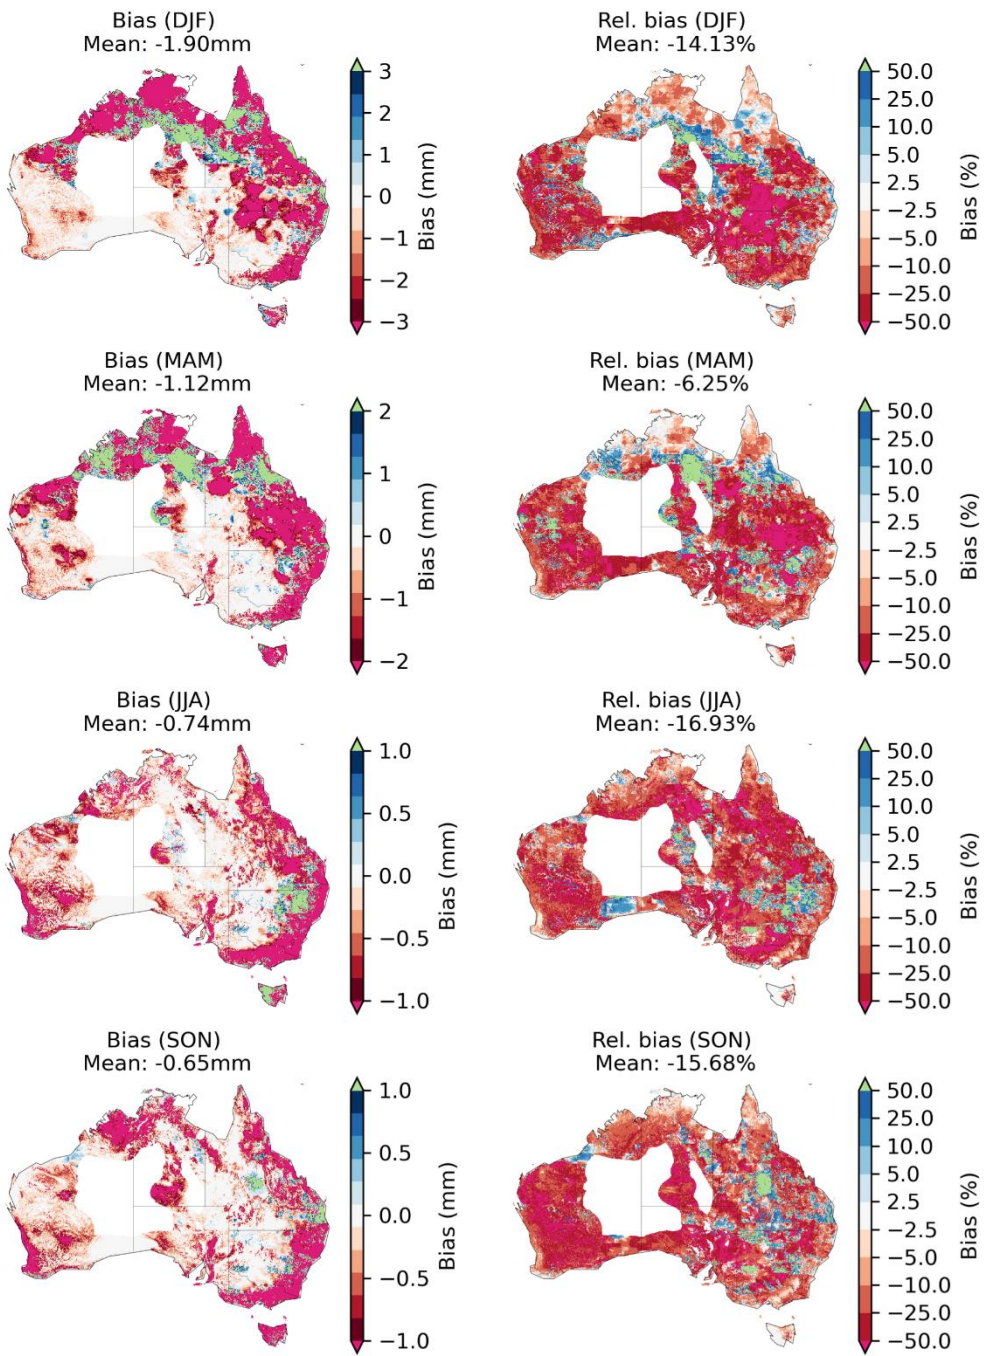

Figure S4: The same as Figure 8(b) but for seasonal values of runoff.

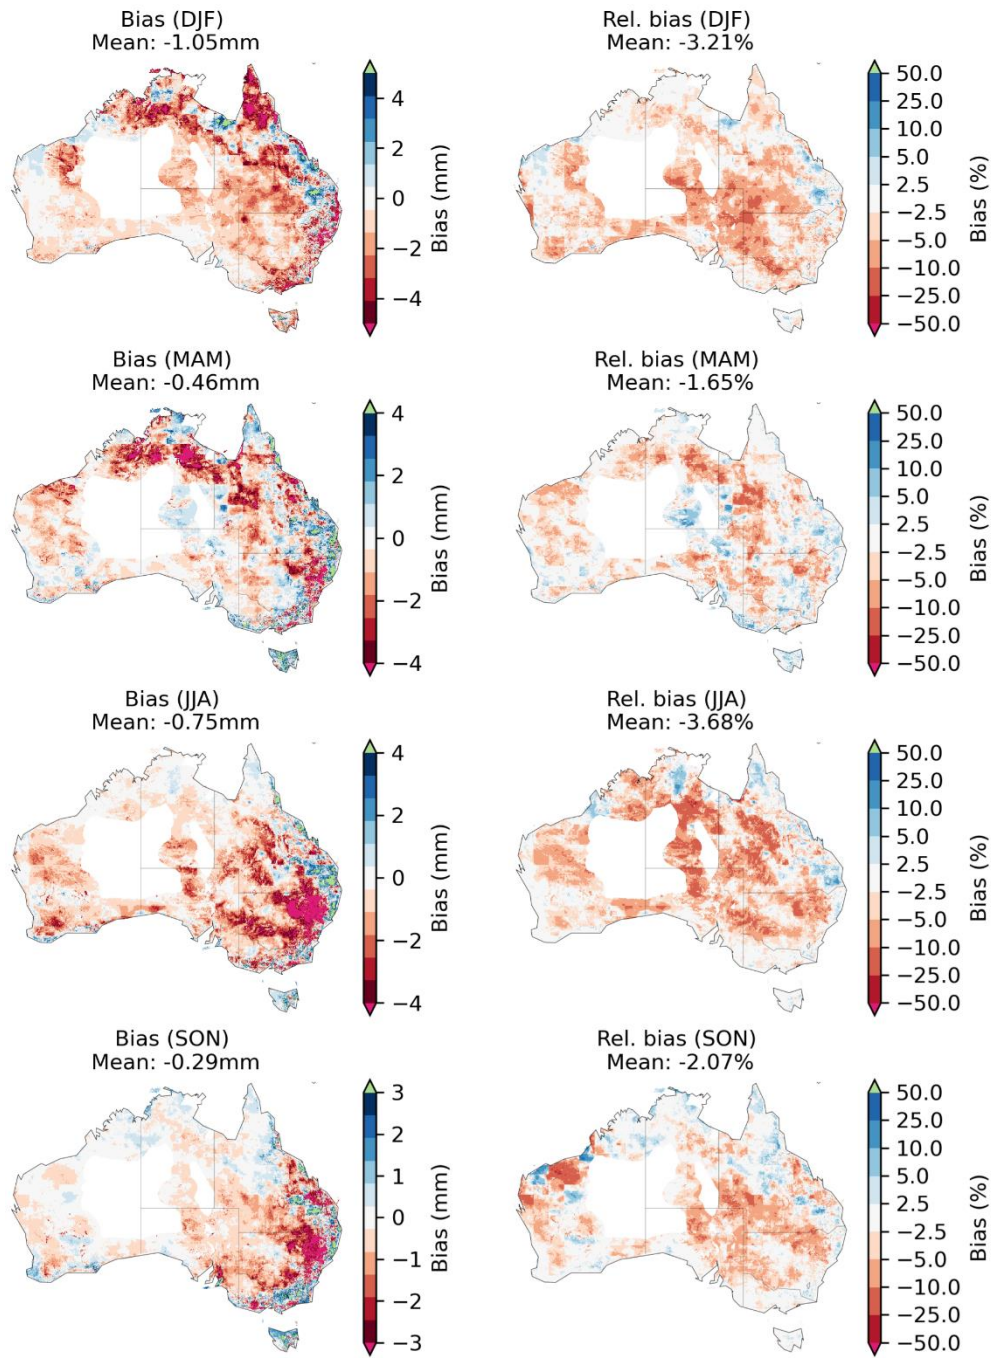

Figure S5: The same as Figure 8(c) but for seasonal values of root-zone soil moisture.

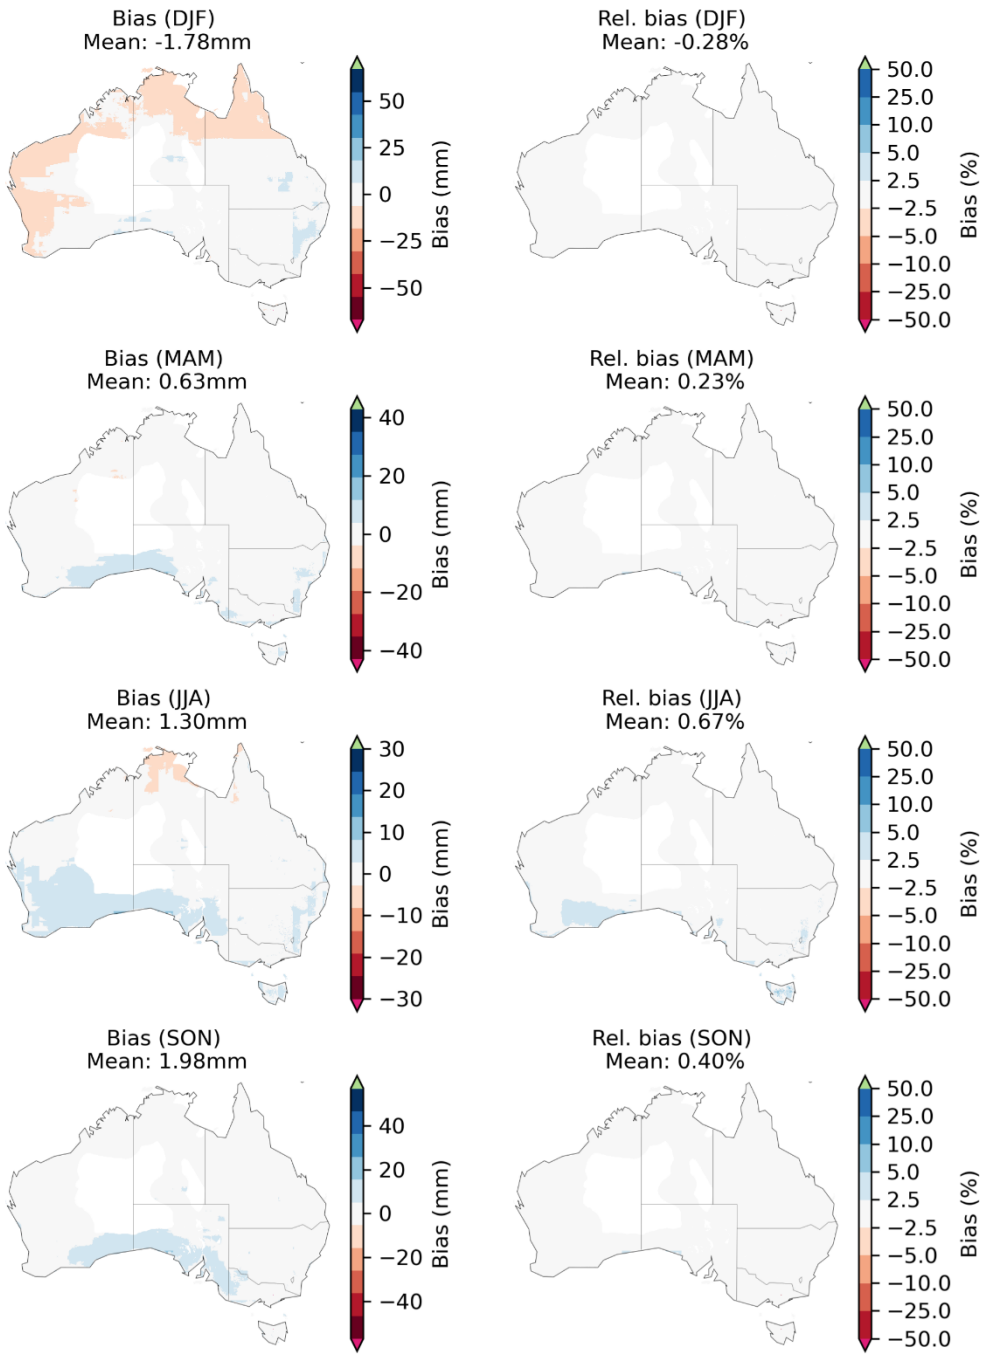

Figure S6: The same as Figure 8(d) but for seasonal values of potential evapotranspiration.

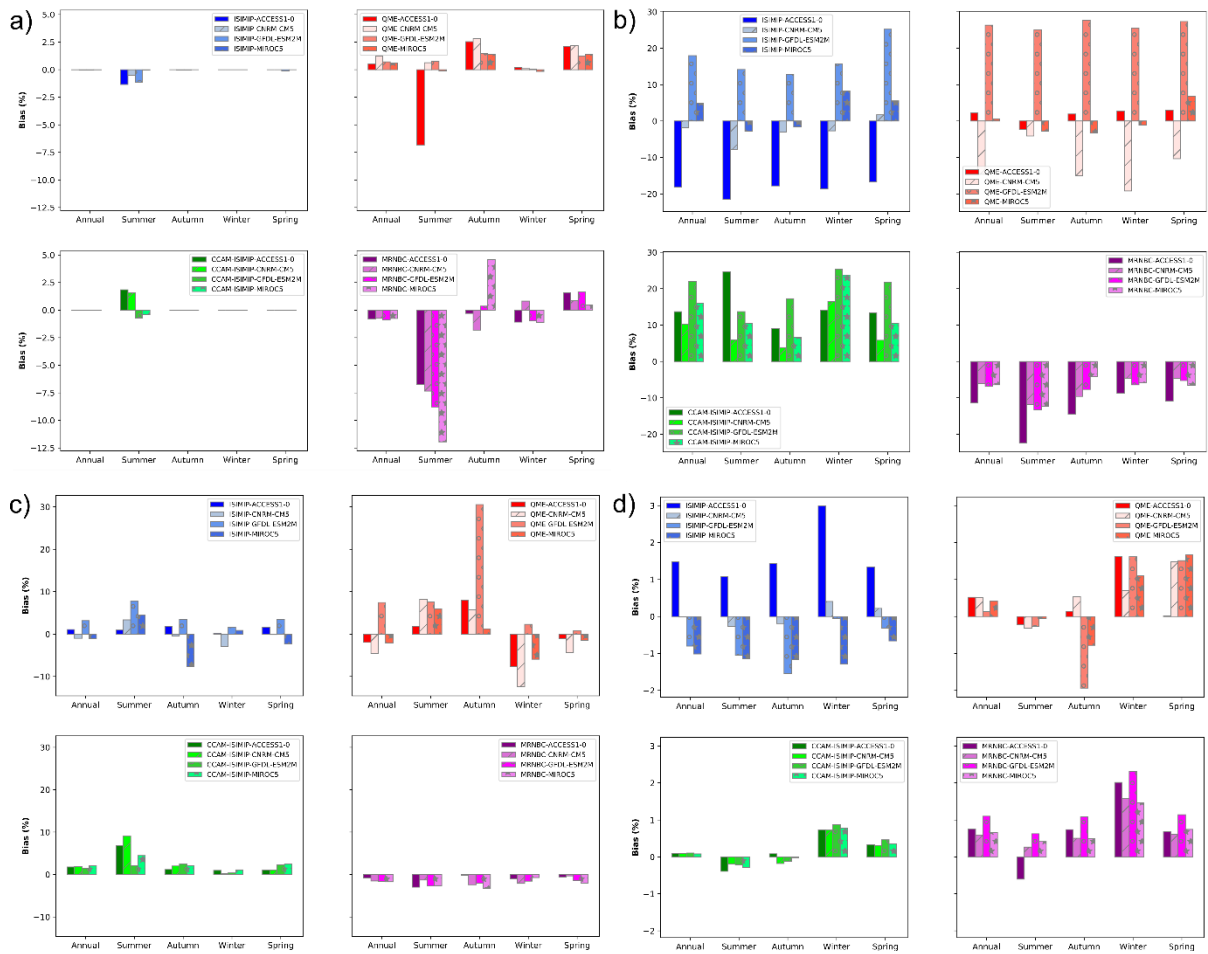

Figure S7: Same as Figure 9, but for the Southern and Southwestern Flatlands (SSWF) NRM region.



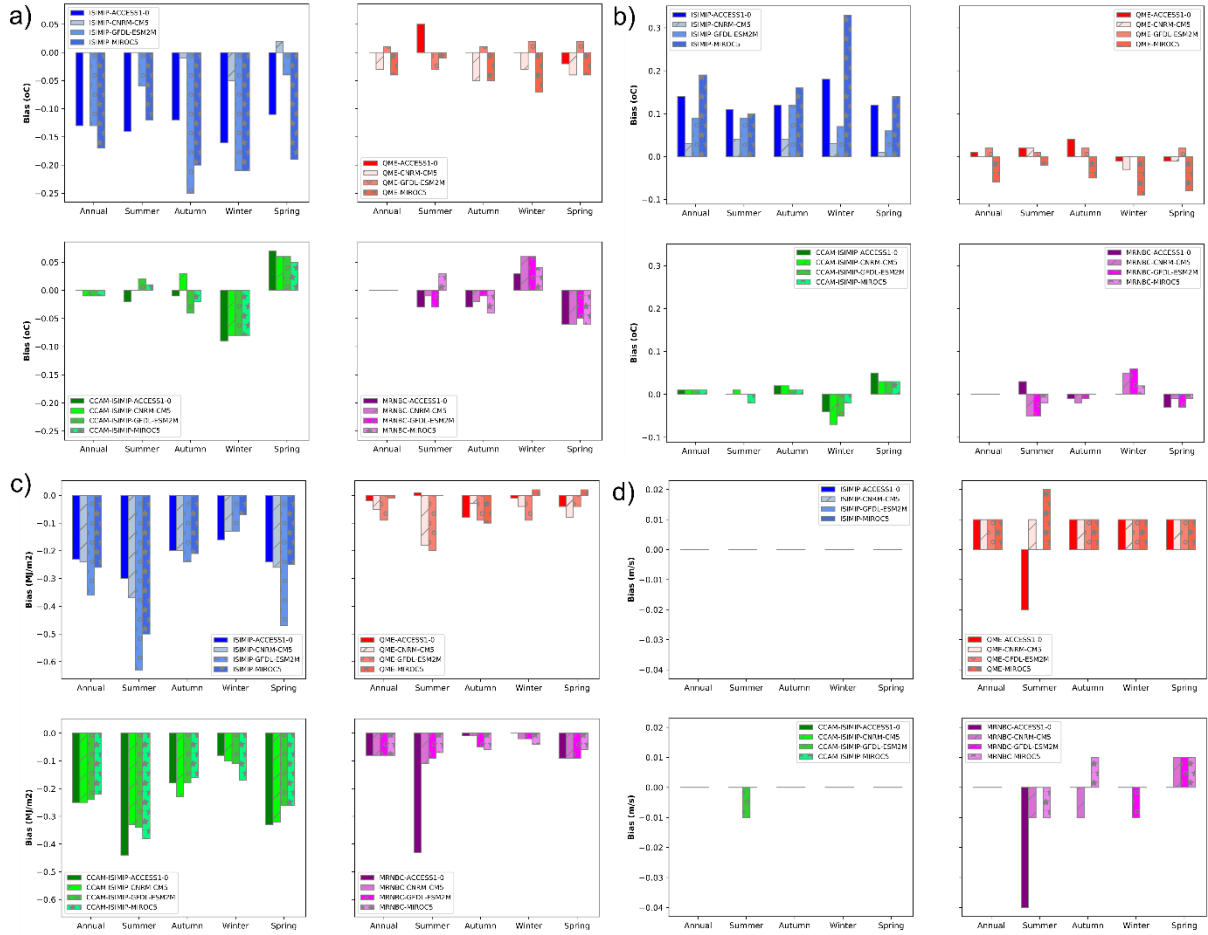

Figure S8: Same as Figure 10, but for the Southern and Southwestern Flatlands (SSWF) NRM region.
